# Supplementary material for: Spiroguanidine rhodamines as fluorogenic probes for lysophosphatidic acid
Source: Royal Society of Chemistry journal article supplement (doi:10.1039/c4cc08818b), 2014-12-09
Supplement: c4cc08818b1.pdf [file c4cc08818b1.pdf]

## Electronic Supplementary Information

### Spiroguanidine rhodamines as fluorogenic probes for lysophosphatidic acid

Lei Wang,<sup>a</sup> Martha Sibrian-Vazquez,<sup>a</sup> Jorge O. Escobedo,<sup>a</sup> Jialu Wang,<sup>a</sup>  
Richard G. Moore<sup>b</sup> and Robert M. Strongin<sup>a,\*</sup>

| CONTENTS:                                                                                                                                                                               | Page |
|-----------------------------------------------------------------------------------------------------------------------------------------------------------------------------------------|------|
| Absorbance and fluorescence measurements                                                                                                                                                | S3   |
| <b>Figure S1.</b> Absorption spectra of 5 $\mu\text{M}$ solutions of <b>1</b> and <b>2</b> .                                                                                            | S3   |
| <b>Figure S2.</b> Excitation and emission spectra of 5 $\mu\text{M}$ solutions of <b>1</b> and <b>2</b> .                                                                               | S3   |
| <b>Figure S3.</b> Excitation and emission spectra of <b>2</b> and <b>2</b> in the presence of LPA 14:0, 16:0, 18:0 and 18:1.                                                            | S4   |
| <b>Figure S4.</b> Fluorescence emission intensity of <b>2</b> alone and in the presence of LPA 14:0, 16:0, 18:0, 18:1 over time.                                                        | S4   |
| <b>Figure S5.</b> Fluorescence emission intensity of <b>2</b> and <b>2</b> -LPA in $\text{CHCl}_3$ solutions with variable DMSO content.                                                | S5   |
| <b>Table S1.</b> Spectroscopic properties of <b>1</b> and <b>2</b> in EtOH.                                                                                                             | S5   |
| LC-MS/MS LPA analysis                                                                                                                                                                   | S6   |
| LPA standard solution preparation                                                                                                                                                       | S6   |
| <b>Figure S6.</b> Job's plot for the complex formed between <b>2</b> and LPA16:0.                                                                                                       | S6   |
| <b>Figure S7.</b> Calibration curves of LPA using the LC-ESI/MS/MS method.                                                                                                              | S7   |
| <b>Table S2.</b> Statistical values obtained for the individual LPA species in the LC-ESI/MS/MS method.                                                                                 | S7   |
| <b>Figure S8.</b> LC-ESI/MS/MS chromatography of a 10 $\mu\text{M}$ standard mixture of LPA.                                                                                            | S8   |
| <b>Figure S9.</b> Calibration curve derived from a solution of <b>2</b> (10 $\mu\text{M}$ ) upon titration with LPA. Ex/Em = 550 nm/570 nm; solvent system: $\text{CHCl}_3$ :DMSO 95:5. | S8   |
| <b>Scheme S1.</b> Equilibria between spirocyclic and open forms of spiroguanidine rhodamines <b>1</b> and <b>2</b> .                                                                    | S9   |
| <b>Figure S10.</b> Double reciprocal plot of $1/(I-I_0)$ vs. $1/[2]$ to calculate the binding constant $K_a$ of <b>2</b> to LPA.                                                        | S10  |
| <b>Figure S11.</b> Emission spectra of 10 $\mu\text{M}$ <b>2</b> upon titration with LPA.                                                                                               | S10  |
| Synthesis of <b>1</b> and <b>2</b>                                                                                                                                                      | S11  |
| <b>Figure S12.</b> $^1\text{H}$ -NMR spectrum of <b>4</b> in $\text{CDCl}_3$ .                                                                                                          | S15  |
| <b>Figure S13.</b> $^{13}\text{C}$ -NMR spectrum of <b>4</b> in $\text{CDCl}_3$ .                                                                                                       | S15  |
| <b>Figure S14.</b> $^1\text{H}$ -NMR spectrum of <b>5</b> in $\text{CDCl}_3$ .                                                                                                          | S16  |
| <b>Figure S15.</b> $^{13}\text{C}$ -NMR spectrum of <b>5</b> in $\text{CDCl}_3$ .                                                                                                       | S16  |
| <b>Figure S16.</b> $^1\text{H}$ -NMR spectrum of <b>1</b> in $\text{DMSO}-d_6$ .                                                                                                        | S17  |
| <b>Figure S17.</b> $^{13}\text{C}$ -NMR spectrum of <b>1</b> in $\text{DMSO}-d_6$ .                                                                                                     | S17  |

|                                                                                     |     |
|-------------------------------------------------------------------------------------|-----|
| <b>Figure S18.</b> $^1\text{H}$ -NMR spectrum of <b>8</b> in $\text{CDCl}_3$ .      | S18 |
| <b>Figure S19.</b> $^{13}\text{C}$ -NMR spectrum of <b>8</b> in $\text{CDCl}_3$ .   | S18 |
| <b>Figure S20.</b> $^1\text{H}$ -NMR spectrum of <b>2</b> in $\text{DMSO}-d_6$ .    | S19 |
| <b>Figure S21.</b> $^{13}\text{C}$ -NMR spectrum of <b>2</b> in $\text{DMSO}-d_6$ . | S19 |
| <b>Figure S22.</b> ESI-MS of <b>4</b> .                                             | S20 |
| <b>Figure S23.</b> ESI-MS of <b>5</b> .                                             | S20 |
| <b>Figure S24.</b> ESI-MS of <b>1</b> .                                             | S21 |
| <b>Figure S25.</b> ESI-MS of <b>8</b> .                                             | S21 |
| <b>Figure S26.</b> ESI-MS of <b>2</b> .                                             | S22 |
| <b>Figure S27.</b> Energy-Minimized structure of <b>2</b> in the presence of LPA.   | S22 |
| <b>References</b>                                                                   | S23 |

### Absorbance and fluorescence measurements

UV Absorbance measurements were performed on a Cary Eclipse™ 50 Bio UV-Vis Spectrophotometer. Fluorescence measurements were performed on a Cary Eclipse™ Fluorescence Spectrophotometer (Agilent Technologies). Fluorescence spectra were recorded at an excitation/emission wavelength of 550 nm/570 nm with excitation and emission bandwidths set at 5 nm.

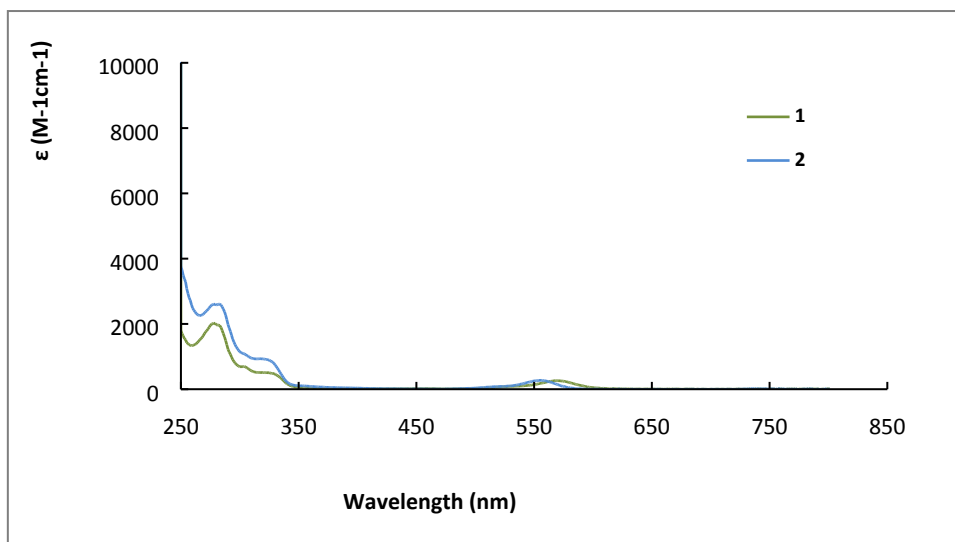

**Figure S1.** Absorption spectra of 5  $\mu$ M solutions of **1** and **2** in  $\text{CHCl}_3$ :DMSO 9:1.

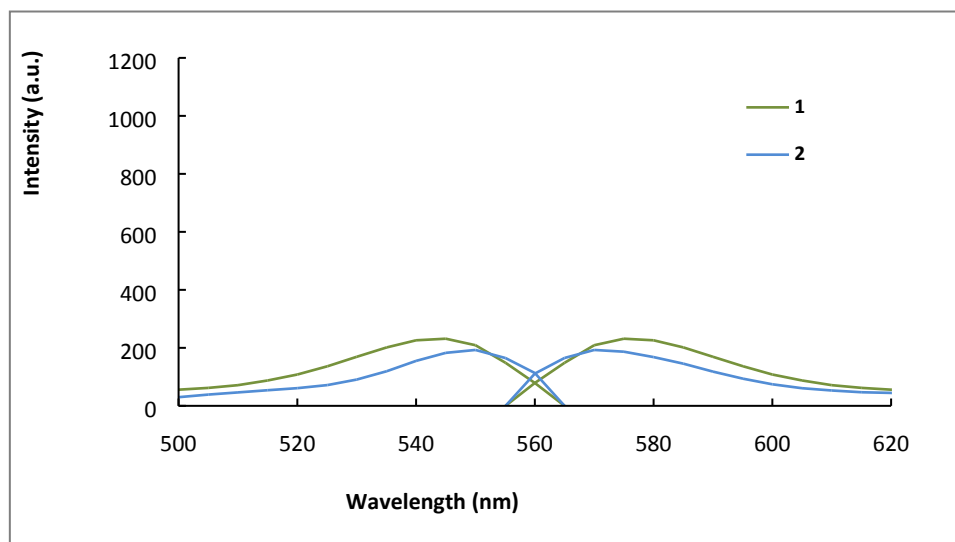

**Figure S2.** Excitation and emission of 5  $\mu$ M solutions of **1** and **2**. Ex/Em = 550 nm/570 nm. solvent system:  $\text{CHCl}_3$ : DMSO 9:1.

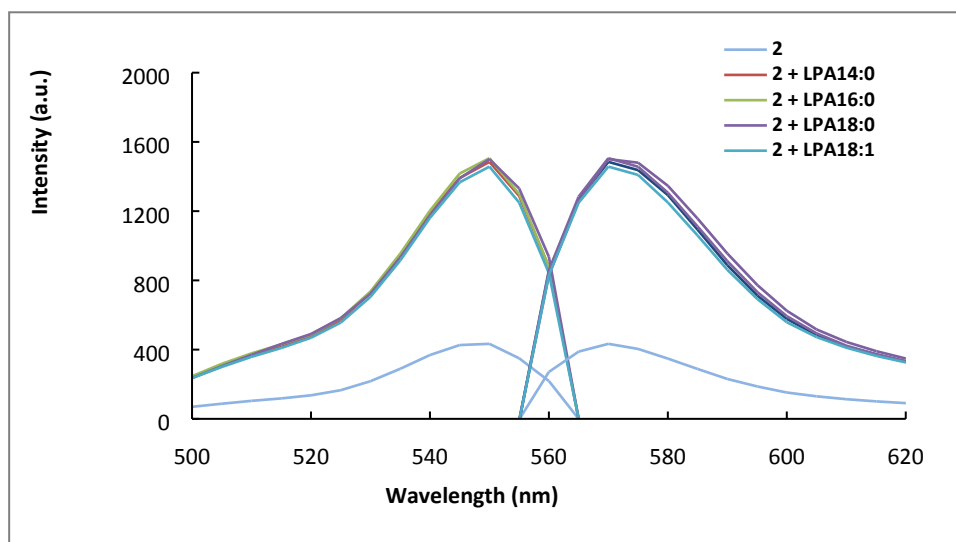

**Figure S3.** Excitation and emission spectra of **2** and **2** in the presence of LPA 14:0, 16:0, 18:0 and 18:1. Ex/Em = 550 nm/570 nm; final probe concentration: 10  $\mu$ M; final LPA concentration: 10  $\mu$ M; solvent system: CHCl<sub>3</sub>:DMSO 9:1.

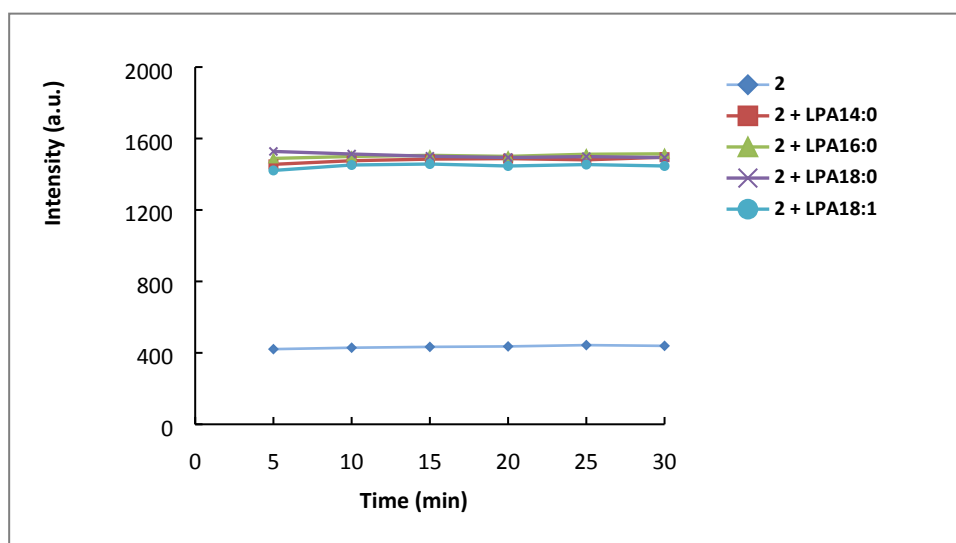

**Figure S4.** Fluorescence emission intensity of **2** alone and in the presence of LPA 14:0, 16:0, 18:0, 18:1 over time. Ex/Em = 550 nm/570 nm; final probe concentration: 10  $\mu$ M; final LPA concentration: 10  $\mu$ M; solvent system: CHCl<sub>3</sub>:DMSO 9:1.

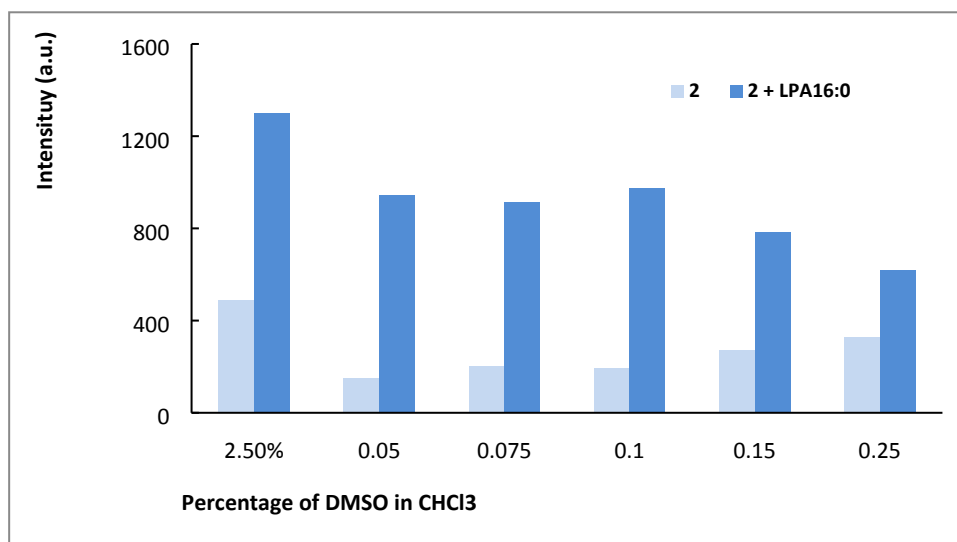

**Figure S5.** Fluorescence emission intensity of **2** and **2**-LPA in CHCl<sub>3</sub> solutions with variable DMSO content. Ex/Em = 550 nm/570 nm; probe concentration: 5  $\mu$ M; LPA16:0 concentration: 10  $\mu$ M.

**Table S1.** Spectroscopic properties of **1** and **2** in EtOH.

|                                                 | <b>1</b> | <b>2</b> |
|-------------------------------------------------|----------|----------|
| $\lambda_{\text{max}}$ absorbance (nm)          | 560      | 560      |
| $\lambda_{\text{max}}$ emission (nm)            | 570      | 570      |
| $\epsilon$ (cm <sup>-1</sup> •M <sup>-1</sup> ) | 695      | 1,026    |
| $\phi$                                          | 0.31     | 0.39     |

### LC-MS/MS LPA analysis

LPA separation was carried out on a Luna C8 ( $50 \times 2$  mm,  $3 \mu\text{m}$ ) column at  $40^\circ\text{C}$  with an injection volume of  $10 \mu\text{L}$ . The mobile phase consisting of a mixture of MeOH:formic acid ( $10 \text{ mM}$ ,  $\text{pH } 2.5$ )  $9:1$  was delivered at a flow rate of  $0.4 \text{ mL/min}$ . Ions were created in the negative ion mode setting the sprayer voltage at  $3.0 \text{ kV}$  and the ion source temperature at  $300^\circ\text{C}$ .

### LPA standard solution preparation

LPA 14:0, 16:0, 18:0, 18:1 and 20:4 in the acid form were obtained by following the SPE procedure developed by Wang *et al.*<sup>1</sup> as follows:  $5 \text{ mg}$  of the corresponding LPA (sodium or ammonium) salt is dissolved in  $3 \text{ mL}$  of HPLC grade water. The solution is acidified by addition of  $50 \mu\text{L}$  of  $85\% \text{ H}_3\text{PO}_4$ . An SPE cartridge (Waters OASIS<sup>TM</sup> HLB  $3 \text{ cc}$ ,  $400 \text{ mg}$ ,  $30 \mu\text{m}$ ) is preconditioned with  $6 \text{ mL}$  MeOH, followed by  $3 \text{ mL}$   $\text{H}_2\text{O}$ . The acidified LPA solution is loaded onto the cartridge and rinsed with  $3 \text{ mL}$   $\text{H}_2\text{O}$  followed by  $1 \text{ mL}$   $\text{CHCl}_3$ . The SPE cartridge is dried by applying a stream of  $\text{N}_2$ , and LPA is eluted with  $4 \text{ mL}$  of MeOH. The solvent is evaporated and the residue reconstituted in  $5 \text{ mL}$  MeOH.

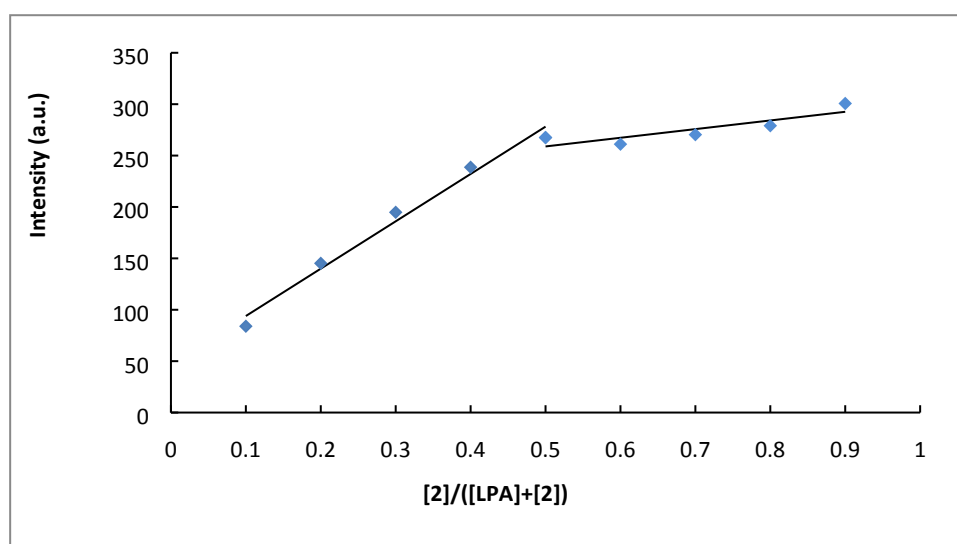

**Figure S6.** Job's plot for the complex formed between **2** and LPA16:0.  $[\mathbf{2}] + [\text{LPA16:0}] = 10 \mu\text{M}$ . Ex/Em =  $550 \text{ nm}/570 \text{ nm}$ ; solvent system:  $\text{CHCl}_3:\text{DMSO } 95:5$ .

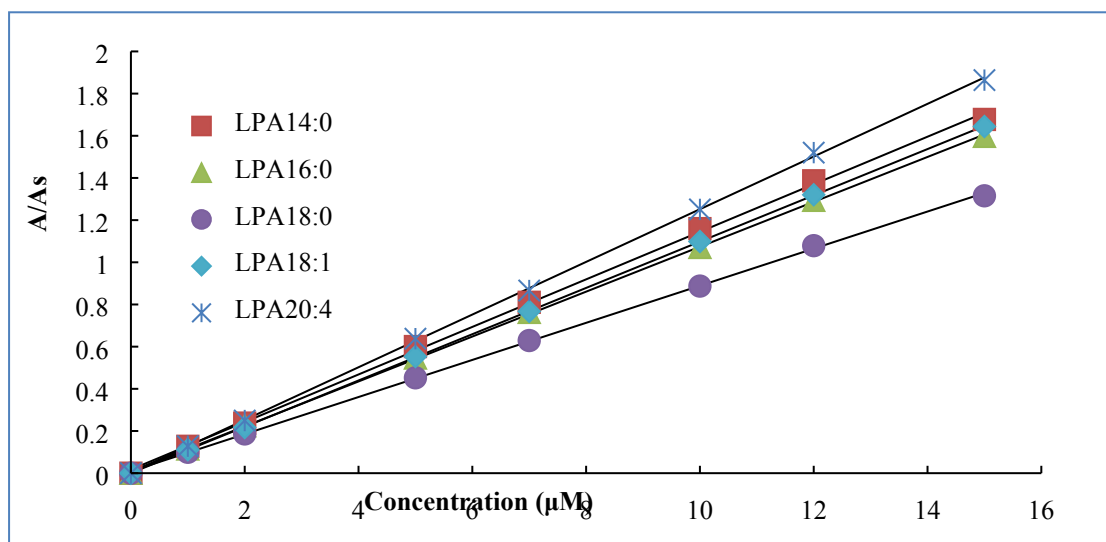

**Figure S7.** Calibration curves of LPA using the LC-ESI/MS/MS method. The area ratio (A/As) is the peak area of individual LPA divided by the peak area of the internal standard (LPA 17:0). Data points represent the average of 3 runs.

**Table S2.** Statistical values obtained for the individual LPA species in the LC-ESI/MS/MS method ( $n=3$ )

| LPA species | Retention time (min) | Linear range (μM) | $R^2$   | LOD (μM) |
|-------------|----------------------|-------------------|---------|----------|
| 14:0        | 3.21                 | 0-15              | 0.99918 | 0.02499  |
| 16:0        | 4.09                 | 0-15              | 0.99987 | 0.01594  |
| 18:0        | 5.51                 | 0-15              | 0.99970 | 0.03968  |
| 18:1        | 4.48                 | 0-15              | 0.99998 | 0.01966  |
| 20:4        | 3.71                 | 0-15              | 0.99977 | 0.00840  |

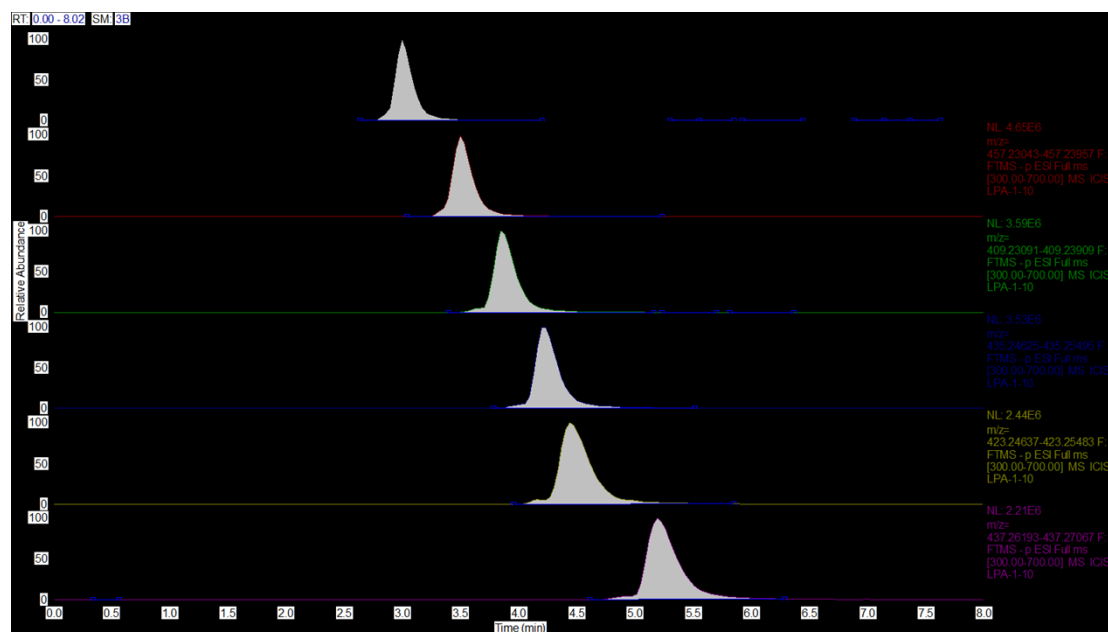

**Figure S8.** LC-ESI/MS/MS chromatography of a 10  $\mu$ M standard mixture of LPAs. Column: Luna<sup>TM</sup> C-8 (50 $\times$ 2 mm, 3  $\mu$ m) at 40  $^{\circ}$ C. Injection volume: 10  $\mu$ L. Mobile phase: MeOH:aqueous formic acid (pH 2.5) 9:1 at a flow rate of 0.4 mL/min. Sprayer voltage; 3.0 kV, capillary temperature at 300  $^{\circ}$ C. Parent and daughter ions were detected in the negative ion mode.

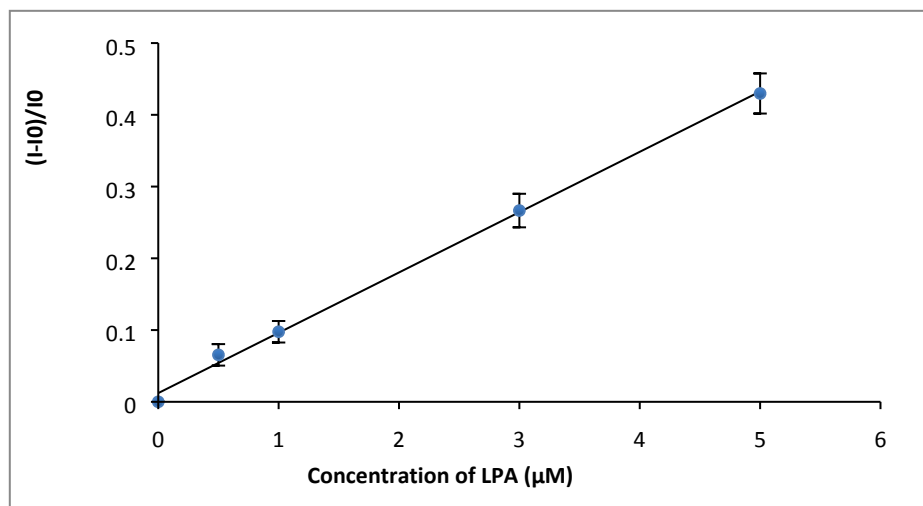

**Figure S9.** Calibration curve derived from a solution of **2** (10  $\mu$ M) upon titration with LPA. Ex/Em = 550 nm/570 nm; solvent system: CHCl<sub>3</sub>:DMSO 95:5.



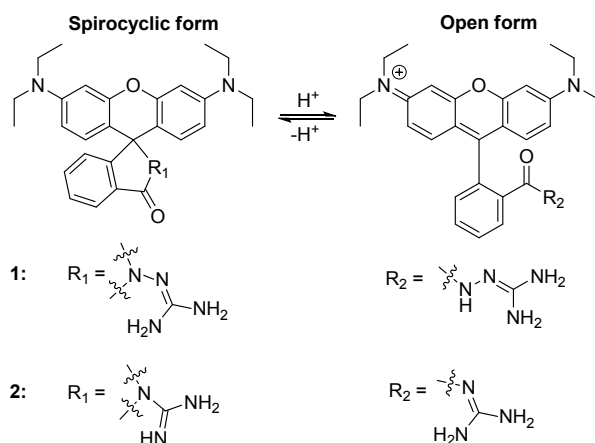

**Scheme S1.** Equilibria between spirocyclic and open forms of spiroguanidine rhodamines **1** and **2**.

For a binding ratio of 1:1, equations (1) and (2) were used. A double reciprocal curve was plotted (**Figure S10**), and from the regression equation,  $K_a = 4.622 \times 10^5 \text{ M}^{-1}$  ( $R^2 = 0.9910$ ).

$$\frac{1}{I - I_0} = \frac{1}{I_\infty - I_0} + \frac{1}{I_\infty - I_0} \times \frac{1}{K_a} \times \frac{1}{[Probe\ 2]} \quad (1)$$

$$K_a = \frac{\text{Intercept}}{\text{Slope}} \quad (2)$$

$I_0$ ,  $I$ ,  $I_\infty$  are the fluorescence intensities of **2** in absence of, in the presence of, and at a concentration corresponding to saturation, respectively, of LPA.  $K_a$  is the binding constant.

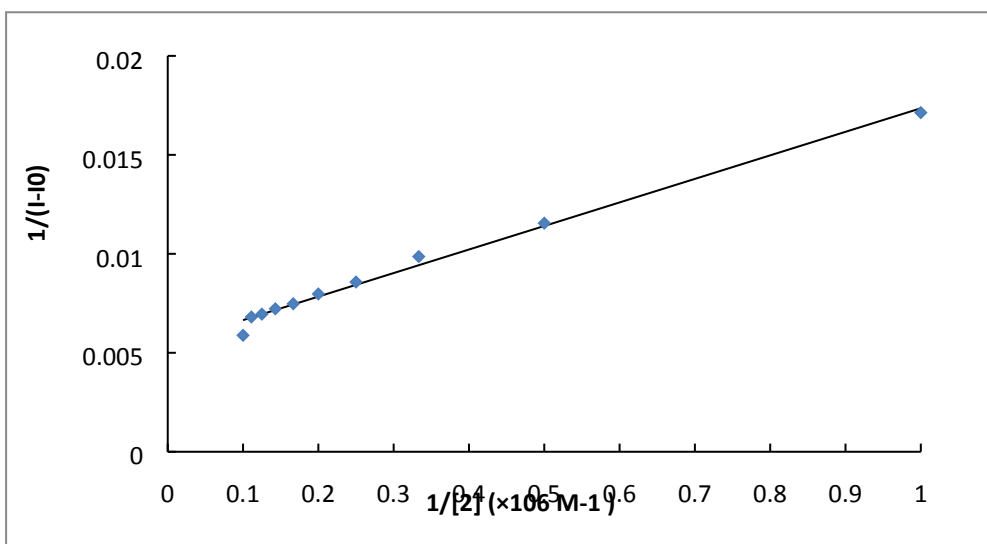

**Figure S10.** Double reciprocal plot of  $1/(I-I_0)$  vs.  $1/[2]$  to calculate the binding constant  $K_a$  of **2** to LPA; LPA16:0 concentration: 5  $\mu\text{M}$ .

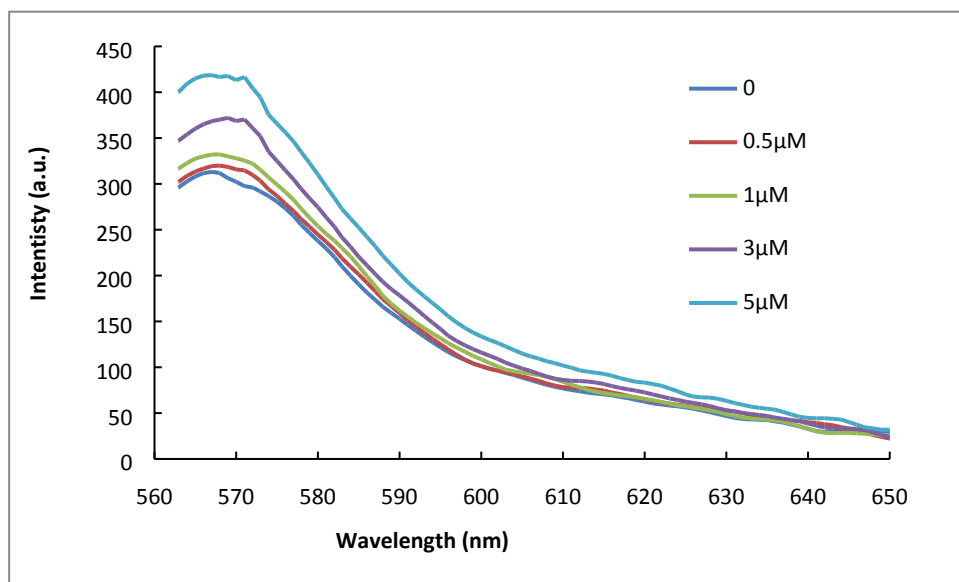

**Figure S11.** Emission spectra of 10  $\mu\text{M}$  **2** upon titration with LPA. Ex/Em = 550 nm/570 nm; solvent system:  $\text{CHCl}_3$ :DMSO 95:5.

## Synthesis of 1 and 2.

Rhodamine B, rhodamine B base, 1,3-*bis*-*boc*-2-methyl-2-thiopseudourea, sodium methoxide solution (0.5 M in MeOH), and 1,3-*bis*-(*tert*-butoxycarbonyl)guanidine were purchased from Sigma-Aldrich. Anhydrous K<sub>2</sub>CO<sub>3</sub> and trifluoroacetic acid were purchased from Fisher Scientific. Mercury(II) chloride was purchased from Acros Organics. Lysophosphatidic acids salts were purchased from Avanti Polar Lipids. Silica gel with a pore diameter of 60Å and particle size of 40-63 µm (230 × 400 mesh) was purchased from Sorbent Technologies. All chemicals were used as received without further purification. NMR spectra were recorded on either a ARX-400 or ARX-600 Advance Bruker spectrometer. MS (HRMS, ESI) spectra were obtained at the PSU Bioanalytical Mass Spectrometry Facility on a Thermo Electron LTQ-Orbitrap Discovery high resolution mass spectrometer.

**2-amino-3',6'-bis(diethylamino)spiro[isoindoline-1,9'-xanthen]-3-one (4).**<sup>2</sup> To a stirred solution of **3** (Scheme 2, 1 g, 2.1 mmol) in EtOH (60 mL) at rt is added hydrazine monohydrate (98%, 0.6 mL, 12 mmol). The mixture heated at reflux for 12 h. After cooling to rt, the solvent is evaporated under reduced pressure. The solid is dissolved in CHCl<sub>3</sub> (50 mL) and the organic phase is washed with H<sub>2</sub>O (3 × 50 mL), followed by drying over anhydrous Na<sub>2</sub>SO<sub>4</sub>. After filtration and removal of the solvent, the crude product is purified by flash chromatography (CH<sub>2</sub>Cl<sub>2</sub>:MeOH 97.5:2.5) to afford a yellow oil. Yield: 950 mg (95%). The characterization data is consistent with the literature.<sup>2</sup>

**(E)-tert-butyl(3',6'-bis(diethylamino)-3-oxospiro[isoindoline-1,9'-xanthene]-2-ylamino)(tert-butoxy-carbonylamino) methylenecarbamate (5).** To a stirred solution of **4** (290 mg, 0.64 mmol), HgCl<sub>2</sub> (190 mg, 0.70 mmol) and 1,3-*bis*-*boc*-2-methyl-2-thiopseudourea (188 mg, 0.70 mmol) in anhydrous DMF (10 mL) under Ar is added Et<sub>3</sub>N (0.45 mL, 3.18 mmol). The suspension is stirred over an ice bath for 2 h, and then at rt for 12h. The mixture is diluted with CHCl<sub>3</sub> and filtered through celite. The filtrate is washed with saturated aqueous NaHCO<sub>3</sub> (25 mL) and H<sub>2</sub>O (3 × 25 mL). The organic phase is dried over anhydrous Na<sub>2</sub>SO<sub>4</sub>. After filtration and removal of solvent, the crude product is purified by flash chromatography (EtOAc:hexane 1:2) to

afford a purple solid with a yield of 410 mg (90%). <sup>1</sup>H-NMR (600 MHz, CDCl<sub>3</sub>) δ 1.16 (t, *J* = 6.9 Hz, 12H), 1.37 (s, 9H), 1.38 (s, 9H), 3.33 (m, *J* = 6.8 Hz, 8H), 6.27 (dd, *J* = 32.5, 8.2 Hz, 2H), 6.36 (d, *J* = 14.9 Hz, 2H), 6.77 (s, 1H), 7.10 (t, *J* = 7.3 Hz, 1H), 7.46 (m, 2H), 7.94 (t, *J* = 10.8 Hz, 1H), 9.33 (s, 1H), 11.16 (s, 1H). <sup>13</sup>C NMR (151 MHz, CDCl<sub>3</sub>) δ 12.78, 28.07, 28.35, 44.47, 66.68, 78.80, 83.25, 97.81, 104.55, 108.02, 123.60, 124.19, 128.02, 128.23, 129.03, 133.21, 149.03, 152.35, 153.75, 156.39, 163.56. ESI-MS (*m/z*) for C<sub>39</sub>H<sub>50</sub>N<sub>6</sub>O<sub>6</sub> [M+H]<sup>+</sup>: calculated 699.3864, observed 699.3932.

**1-(3',6'-bis(diethylamino)-3-oxospiro[isoindoline-1,9'-xanthene]-2-yl)guanidine**

**(1).** To a stirred solution of **5** (380 mg, 0.55 mmol) in CH<sub>2</sub>Cl<sub>2</sub> (2 mL) is slowly added 4 mL of a TFA:CH<sub>2</sub>Cl<sub>2</sub> 1:1 solution. Stirring at rt is continued until the reaction is complete according to TLC analysis. Solvent and excess TFA are evaporated under reduced pressure to afford the trifluoroacetate salt as a dark purple solid. The solid is dissolved in anhydrous MeOH (3 mL). A 0.5 M NaOMe solution (3 mL) is added and the mixture stirred at rt for 1 h. The solvent is evaporated under reduced pressure. The resulting solid is dissolved in CHCl<sub>3</sub> (50 mL) and washed with aqueous saturated NaHCO<sub>3</sub> (25 mL) and H<sub>2</sub>O (3 × 25 mL). The organic phase is dried over anhydrous Na<sub>2</sub>SO<sub>4</sub>. After filtration and removal of the solvent, the crude product is purified by flash chromatography (CH<sub>2</sub>Cl<sub>2</sub>:MeOH 9:1) to afford a purple solid with a yield of 160 mg (60%). <sup>1</sup>H-NMR (600 MHz, DMSO-*d*<sub>6</sub>) δ 1.08 (t, *J* = 7.0 Hz, 3H), 3.30 (q, *J* = 7.1 Hz, 8H), 5.51 (d, *J* = 293.9 Hz, 4H), 6.27 (dd, *J* = 8.9, 2.5 Hz, 2H), 6.30 (d, *J* = 2.5 Hz, 2H), 6.56 (d, *J* = 7.3 Hz, 2H), 6.88 (d, *J* = 6.9 Hz, 1H), 7.42 (m, 2H), 7.71 (d, *J* = 6.5 Hz, 1H). <sup>13</sup>C-NMR (151 MHz, DMSO-*d*<sub>6</sub>) δ 12.49, 43.63, 65.29, 97.15, 105.99, 107.39, 121.78, 123.17, 127.77, 128.72, 130.55, 131.59, 147.93, 152.34, 152.78, 158.53. ESI-MS (*m/z*) for C<sub>29</sub>H<sub>34</sub>N<sub>6</sub>O<sub>2</sub> [M+H]<sup>+</sup>: calculated 499.2860, observed 499.2846.

***N*-(9-(2-(chlorocarbonyl)phenyl)-6-(diethylamino)-3*H*-xanthen-3-ylidene)-*N*-**

**ethylethanaminium (7).**<sup>3</sup> To a solution of **6** (500 mg, 1.13 mmol) in anhydrous 1,2-dichloroethane (5 mL), is added a solution of POCl<sub>3</sub> (0.26 mL, 2.8 mmol) in 1,2-dichloroethane (5 mL) dropwise over 5 min. The mixture is heated at reflux for 4 h.

After the mixture is cooled to rt, the solvent is evaporated under reduced pressure to yield rhodamine B acyl chloride which is used as is in the next reaction.

**(E)-tert-butyl-(3',6'-bis(diethylamino)-3-oxospiro[isoindoline-1,9'-xanthene]-2-yl)methanediylidene-dicarbamate (8).** 1,3-bis(tert-butoxycarbonyl)guanidine (290 mg, 1.13 mmol) and K<sub>2</sub>CO<sub>3</sub> (0.62 g, 4.5 mmol) are dissolved in anhydrous MeCN (5 mL) under Ar. The crude rhodamine B acyl chloride is dissolved in anhydrous MeCN (5 mL) and added dropwise to the solution over 3 h. After 12 h, the solvent is evaporated under reduced pressure and the residue washed with aqueous saturated NaHCO<sub>3</sub> (25 mL) and H<sub>2</sub>O (3 × 25 mL). The combined organic phase is dried over anhydrous Na<sub>2</sub>SO<sub>4</sub>. After filtration and removal of solvent, the crude product is purified by flash chromatography (EtOAc:hexane 1:2) to afford a yellow solid with a yield of 476 mg (62%). <sup>1</sup>H-NMR (600 MHz, CDCl<sub>3</sub>) δ 1.13 (t, *J* = 7.1 Hz, 12H), 1.35 (s, 9H), 1.41 (s, 9H), 3.30 (m, 8H), 6.18 (dd, *J* = 8.8, 2.6 Hz, 2H), 6.30 (d, *J* = 8.8 Hz, 2H), 6.35 (d, *J* = 2.6 Hz, 2H), 7.16 (d, *J* = 7.7 Hz, 1H), 7.51 (m, 1H), 7.58 (td, *J* = 7.5, 1.1 Hz, 1H), 7.94 (d, *J* = 7.6 Hz, 1H), 10.75 (s, 1H). <sup>13</sup>C-NMR (151 MHz, CDCl<sub>3</sub>) δ 12.78, 28.15, 28.18, 44.40, 68.30, 78.74, 81.78, 97.72, 106.68, 107.23, 123.59, 125.09, 127.65, 128.75, 129.20, 135.16, 139.08, 148.97, 150.16, 153.42, 154.20, 156.14, 171.05. ESI-MS (*m/z*) for C<sub>39</sub>H<sub>49</sub>N<sub>5</sub>O<sub>6</sub> [M+H]<sup>+</sup>: calculated 684.3756, observed 684.3794.

**3',6'-bis(diethylamino)-3-oxospiro[isoindoline-1,9'-xanthene]-2-carboximidamide (2).** To a stirred solution of **8** (300 mg, 0.44 mmol) in CH<sub>2</sub>Cl<sub>2</sub> (2 mL) is added slowly 4 mL of a TFA:CH<sub>2</sub>Cl<sub>2</sub> 1:1 solution. Stirring at rt is continued until the reaction is complete based on TLC analysis. Solvent and excess TFA are evaporated under reduced pressure to afford the trifluoroacetate salt as a dark purple solid, which is dissolved in anhydrous MeOH (3 mL). A 0.5 M NaOMe solution (3 mL) is added, and the mixture stirred at rt for 1h. The solvent is evaporated under reduced pressure and the resulting solid is dissolved in CHCl<sub>3</sub> (50 mL), washed with aqueous saturated NaHCO<sub>3</sub> (25 mL) and H<sub>2</sub>O (3 × 25mL). The combined organic phases are dried over anhydrous Na<sub>2</sub>SO<sub>4</sub>. After filtration and removal of solvent, the crude product is purified by flash chromatography (CH<sub>2</sub>Cl<sub>2</sub>:MeOH 9:1) to afford a light purple solid

with a yield of 110 mg (52%).  $^1\text{H}$ -NMR (600 MHz,  $\text{DMSO-}d_6$ )  $\delta$  1.09 (t,  $J = 7.0$  Hz, 12H), 3.34 (q,  $J = 7.1$  Hz, 8H), 6.42 (dd,  $J = 9.0, 2.6$  Hz, 2H), 6.45 (d,  $J = 2.5$  Hz, 2H), 6.72 (d,  $J = 8.9$  Hz, 2H), 7.01 (d,  $J = 7.8$  Hz, 1H), 7.58 (m, 1H), 7.68(m,  $J = 1.1$  Hz, 1H), 7.69 (bs, 3H), 7.99 (d,  $J = 7.7$  Hz, 1H).  $^{13}\text{C}$ -NMR (151 MHz,  $\text{DMSO-}d_6$ )  $\delta$  12.38, 43.69, 79.18, 97.67, 103.08, 108.69, 123.65, 124.39, 124.53, 127.22, 129.43, 136.51, 149.17, 151.72, 153.52, 153.64, 169.01. ESI-MS ( $m/z$ ) for  $\text{C}_{29}\text{H}_{33}\text{N}_5\text{O}_2$   $[\text{M}+\text{H}]^+$ : calculated 484.2707, observed 484.2751.

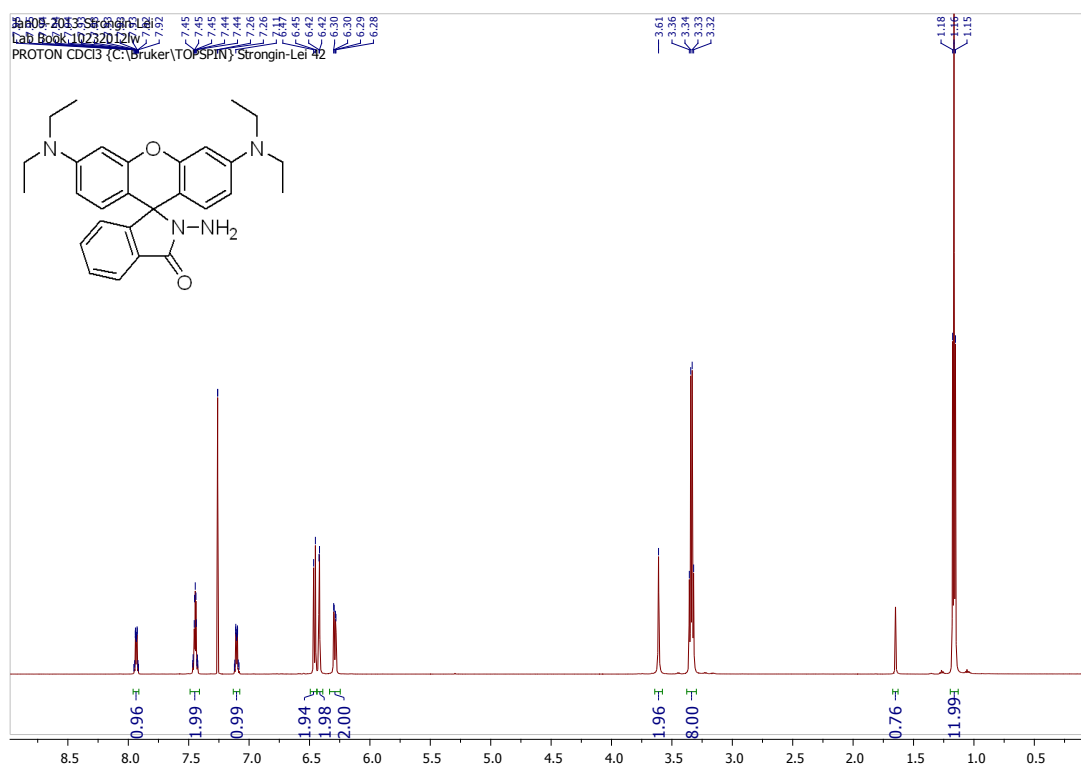

**Figure S12.**  $^1\text{H}$ -NMR spectrum of **4** in  $\text{CDCl}_3$ .

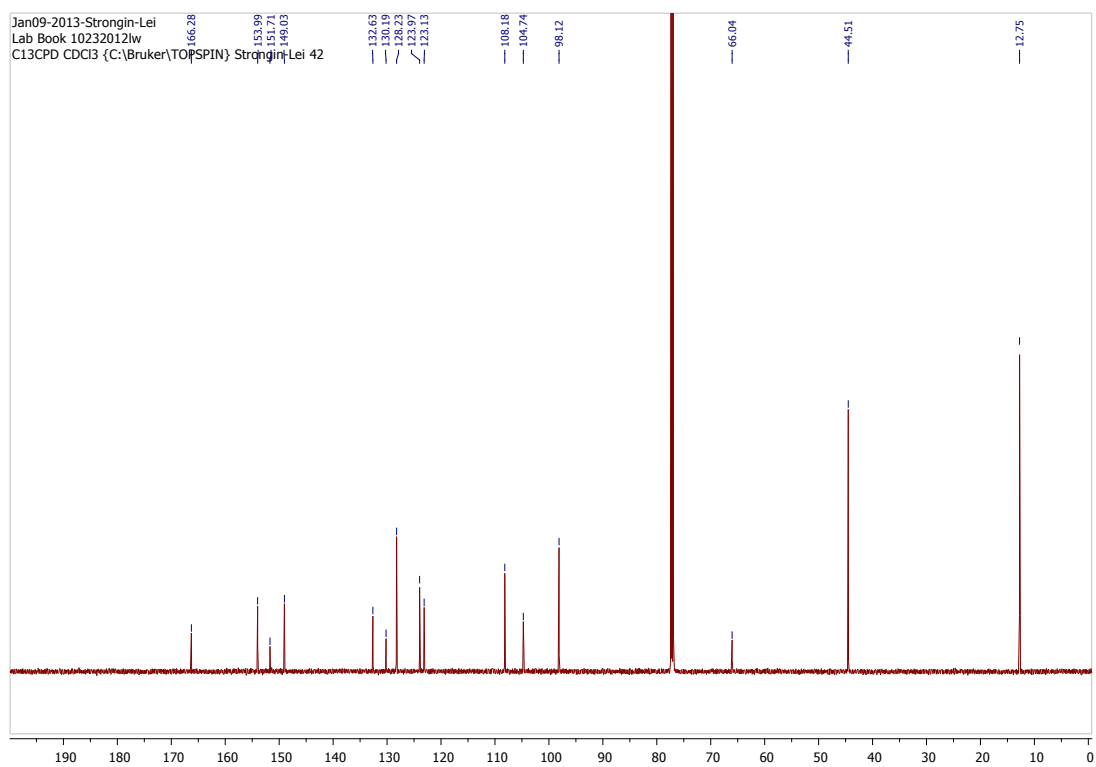

**Figure S13.**  $^{13}\text{C}$ -NMR spectrum of **4** in  $\text{CDCl}_3$ .

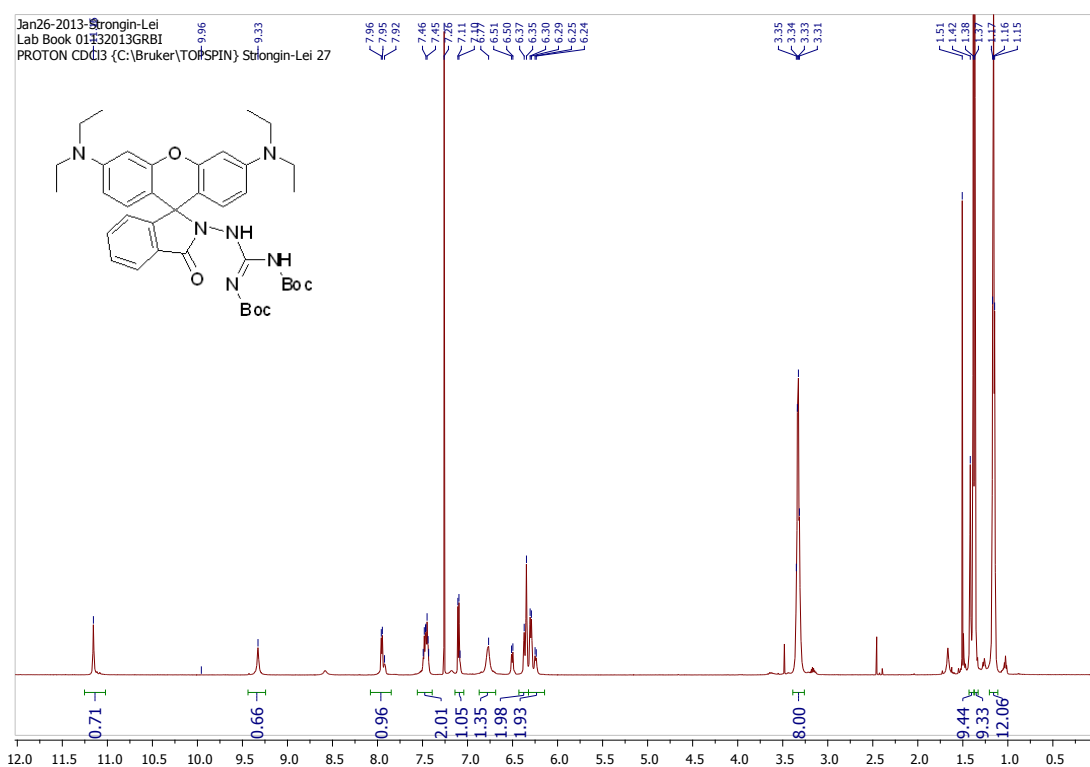

**Figure S14.** <sup>1</sup>H-NMR spectrum of **5** in CDCl<sub>3</sub>.

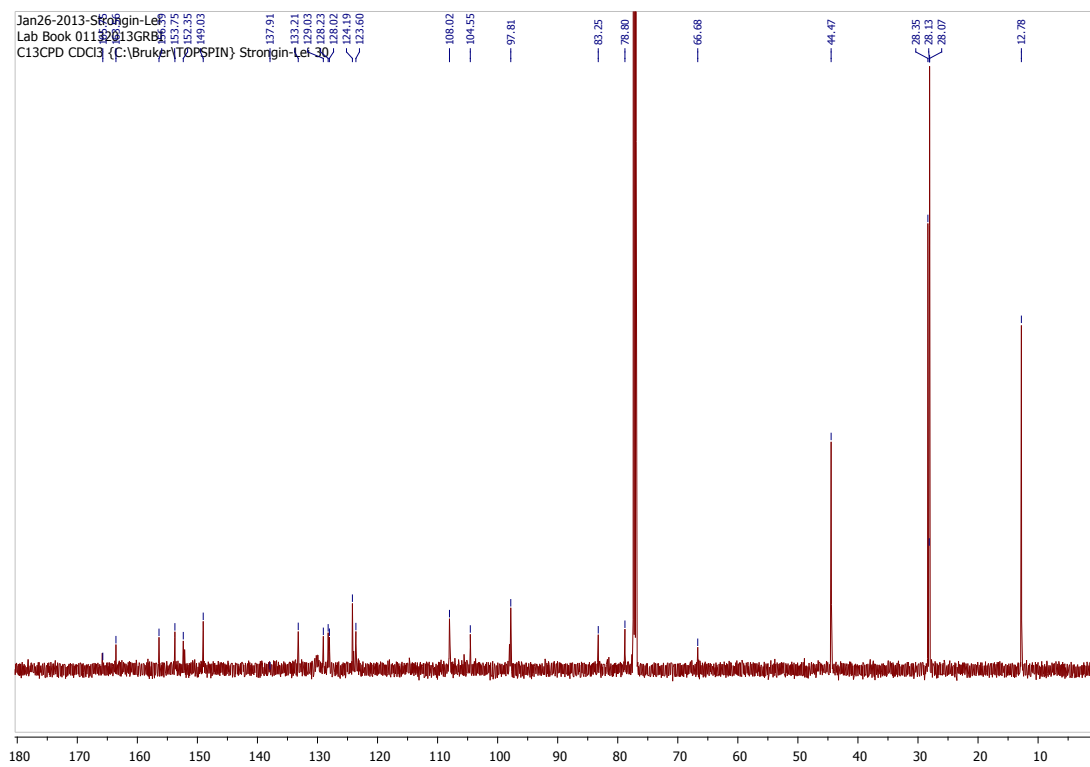

**Figure S15.** <sup>13</sup>C-NMR spectrum of **5** in CDCl<sub>3</sub>.



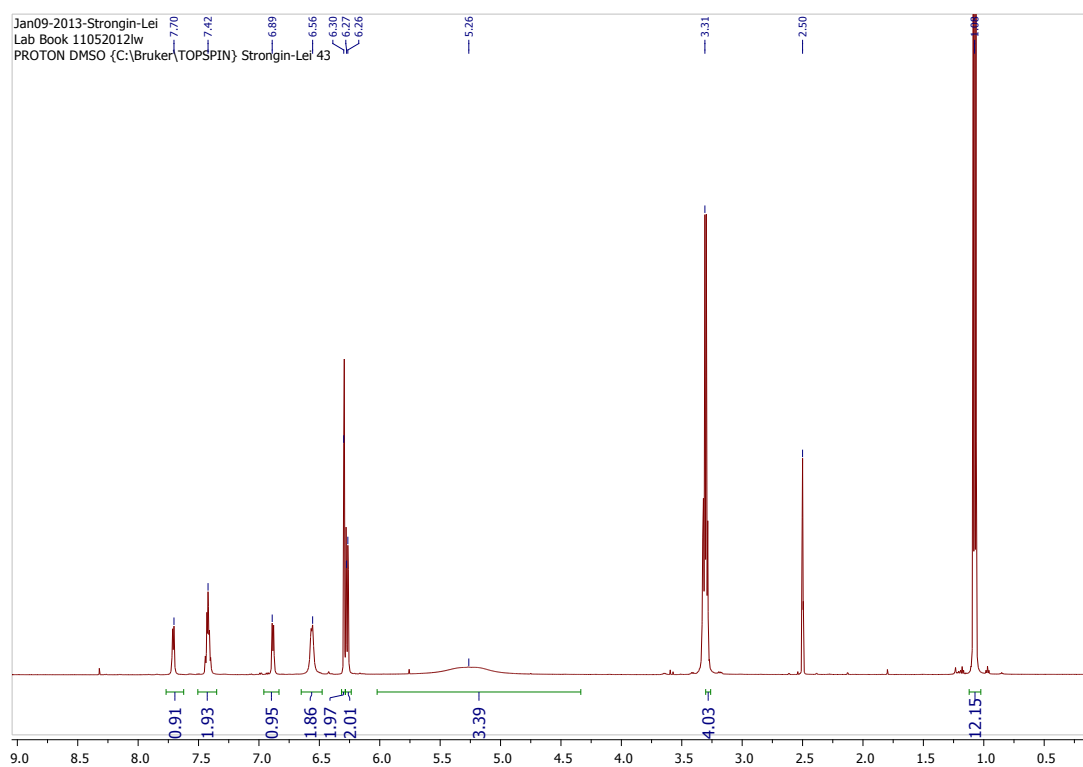

**Figure S16.**  $^1\text{H}$ -NMR spectrum of **1** in  $\text{DMSO}-d_6$ .

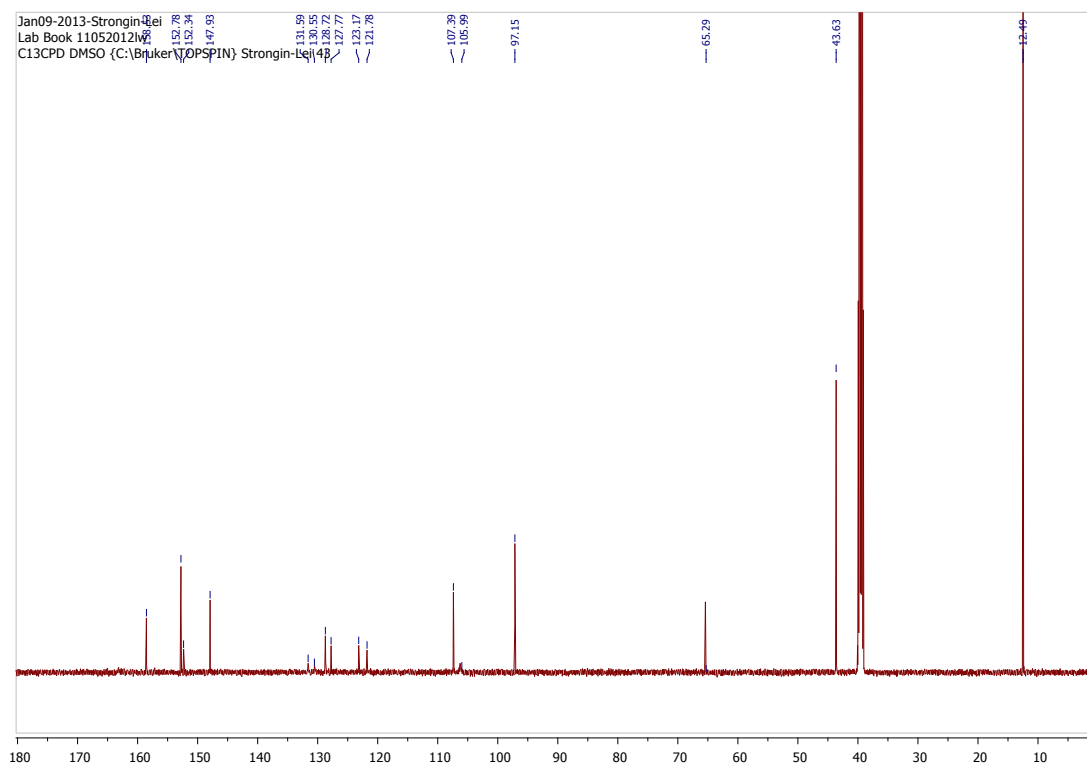

**Figure S17.**  $^{13}\text{C}$ -NMR spectrum of **1** in  $\text{DMSO}-d_6$ .

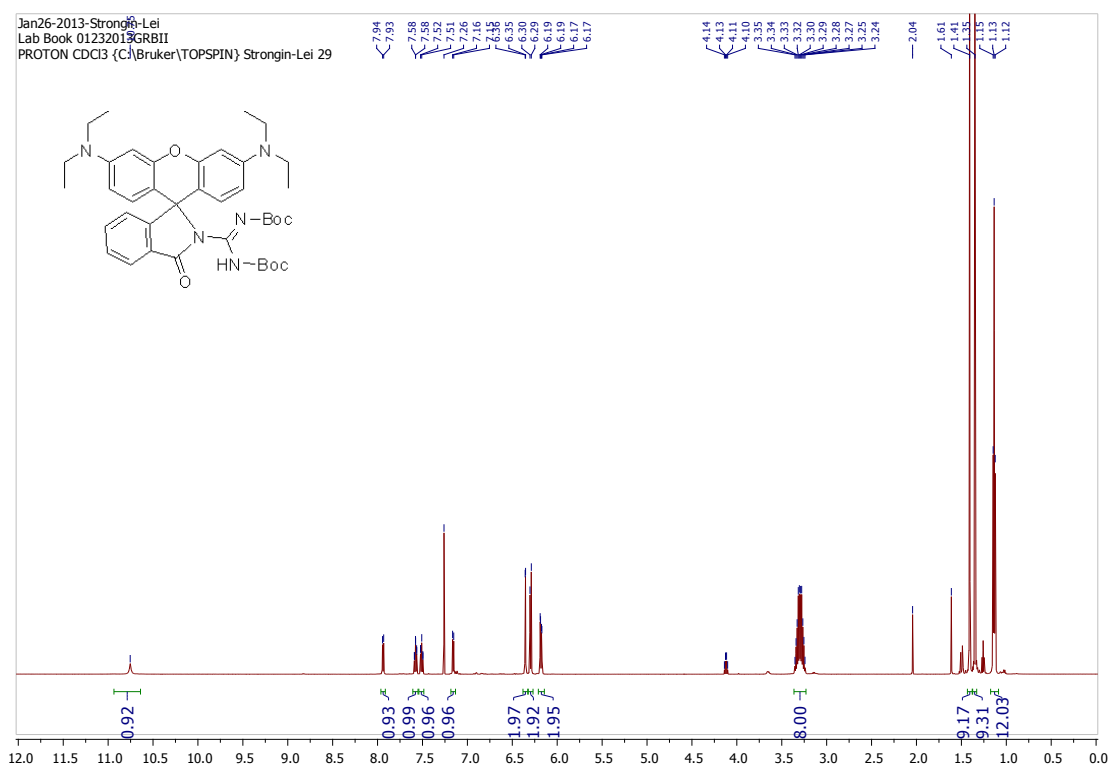

**Figure S18.** <sup>1</sup>H-NMR spectrum of **8** in CDCl<sub>3</sub>.

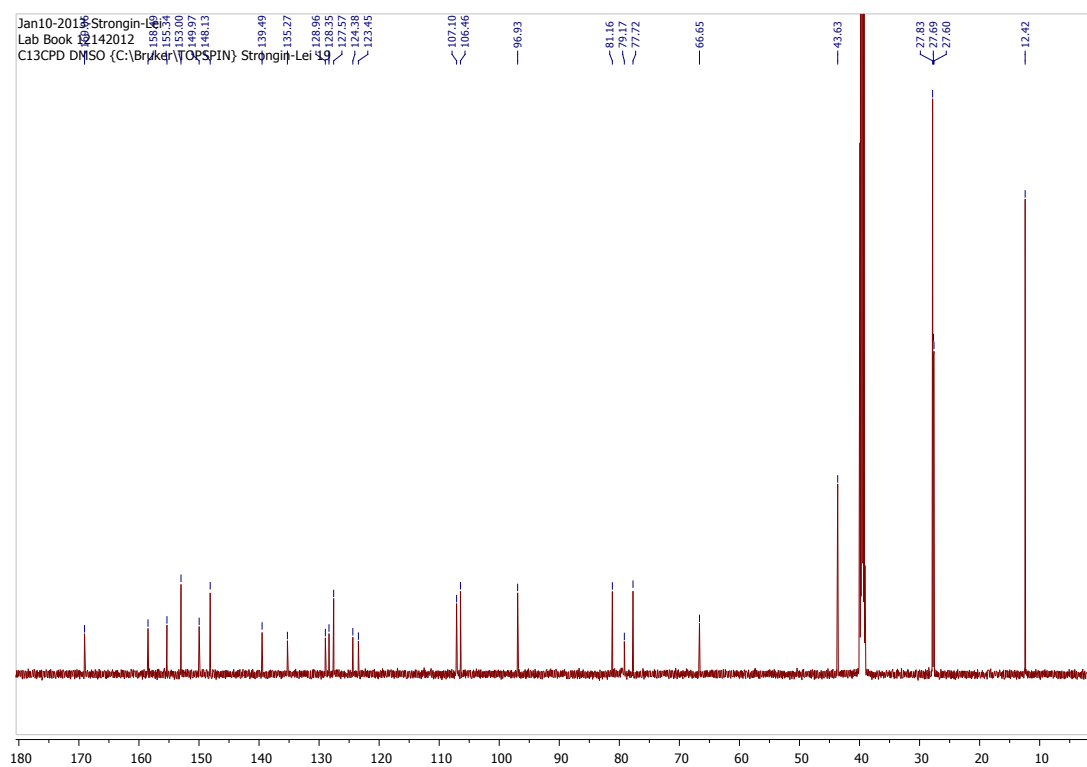

**Figure S19.** <sup>13</sup>C-NMR spectrum of **8** in CDCl<sub>3</sub>.

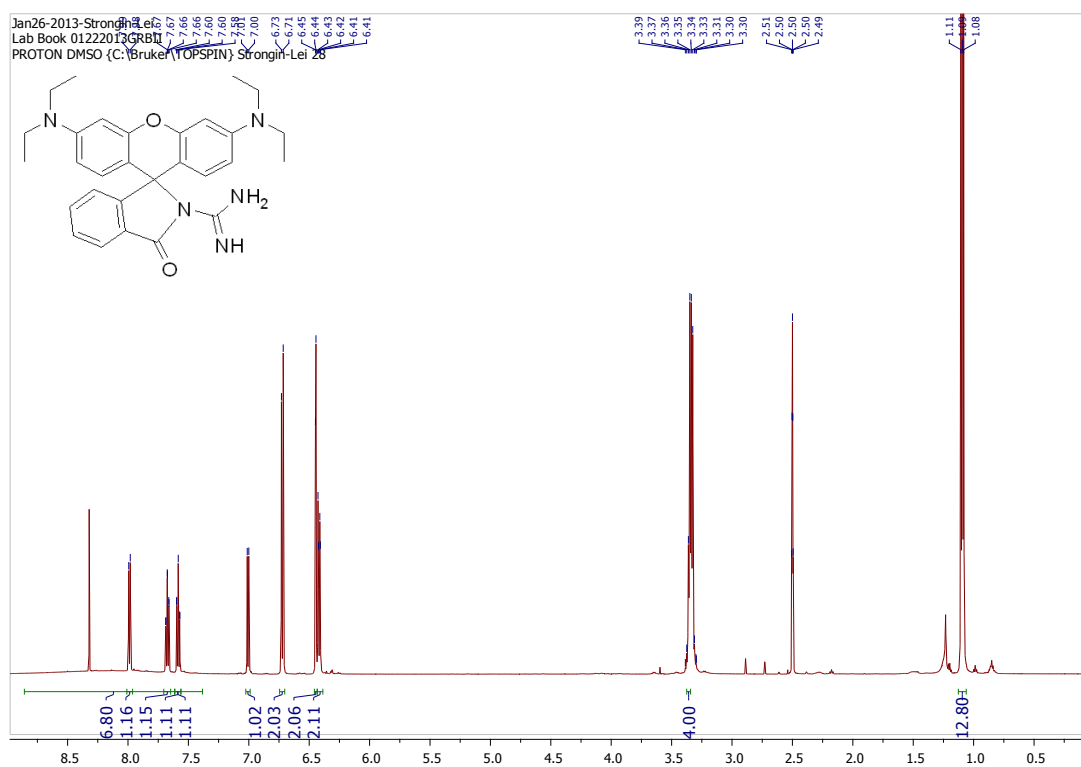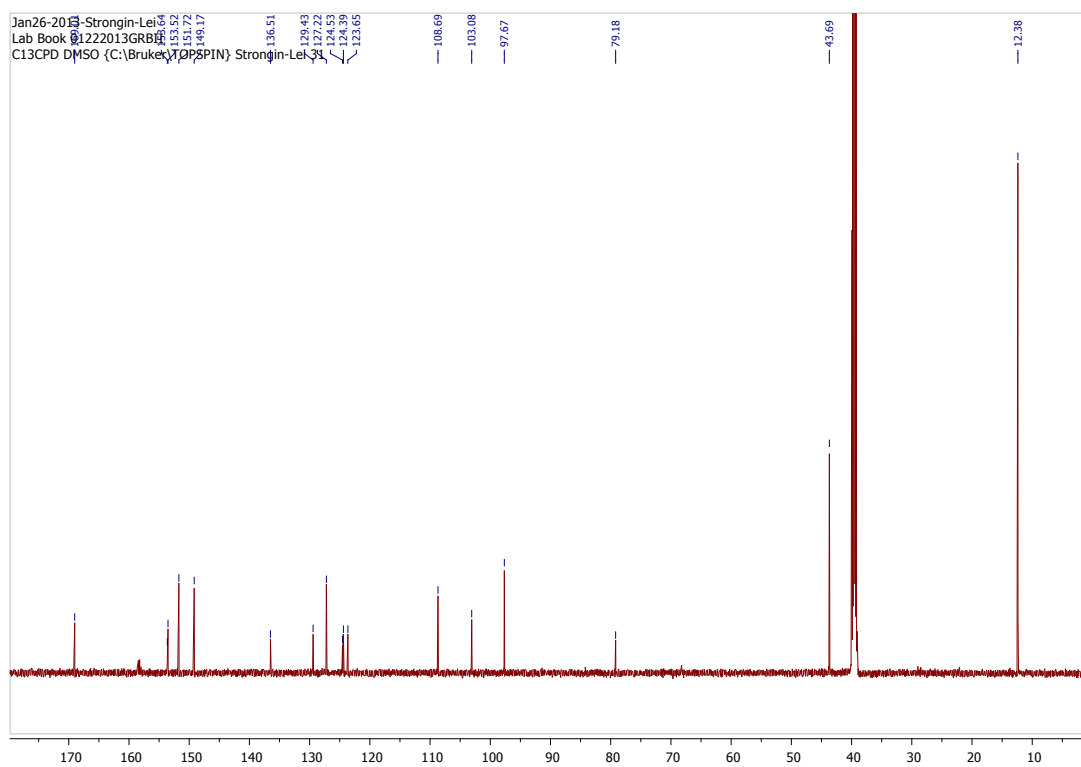

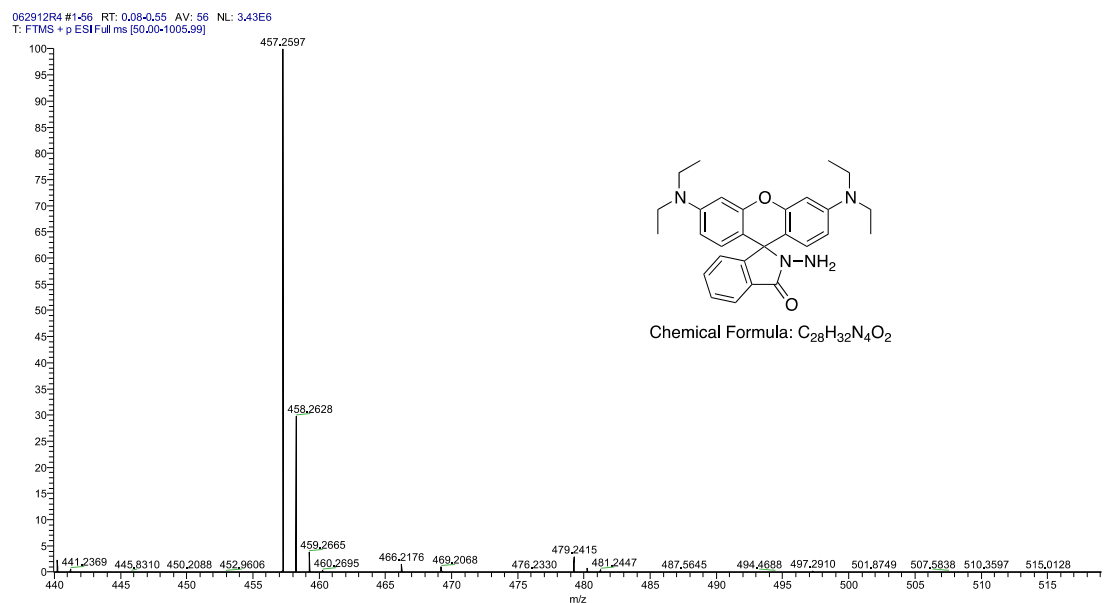

**Figure S22.** ESI-MS of 4.

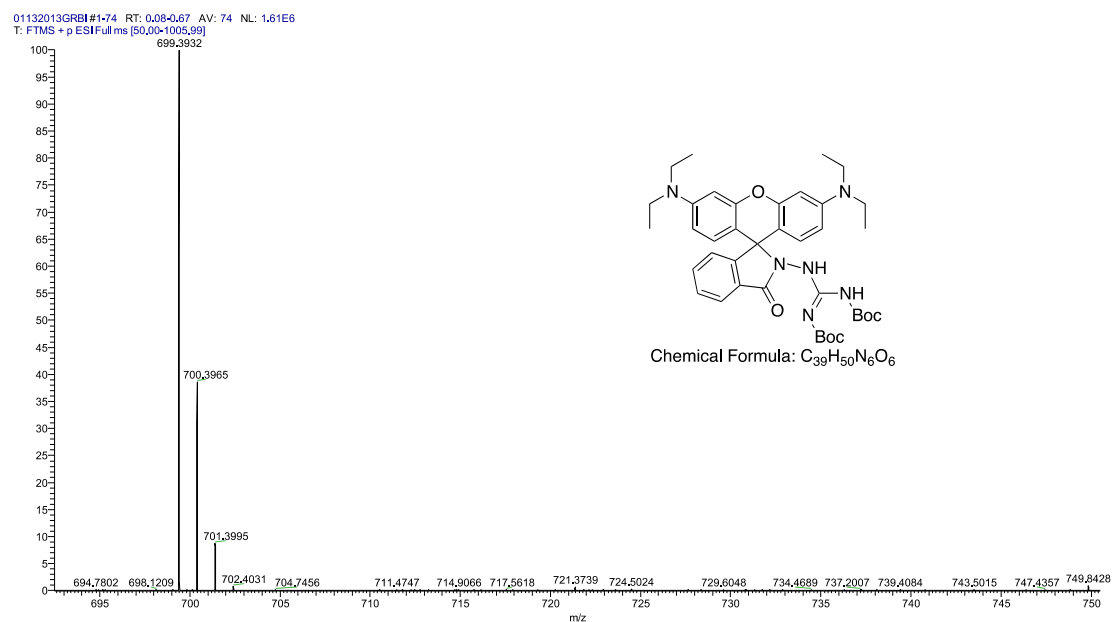

**Figure S23.** ESI-MS of 5.

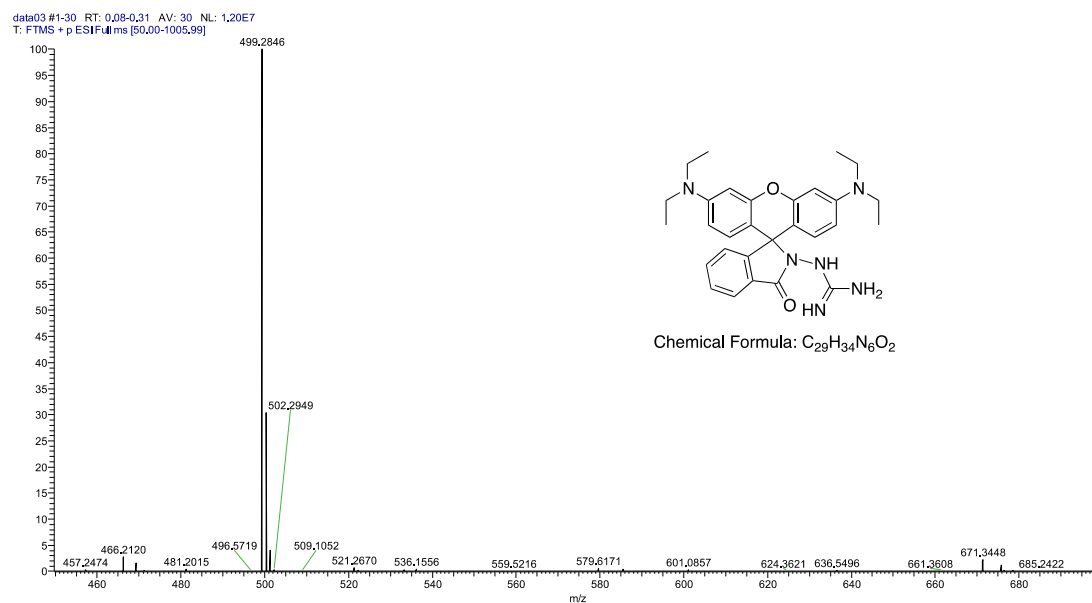

**Figure S24.** ESI-MS of **1**.

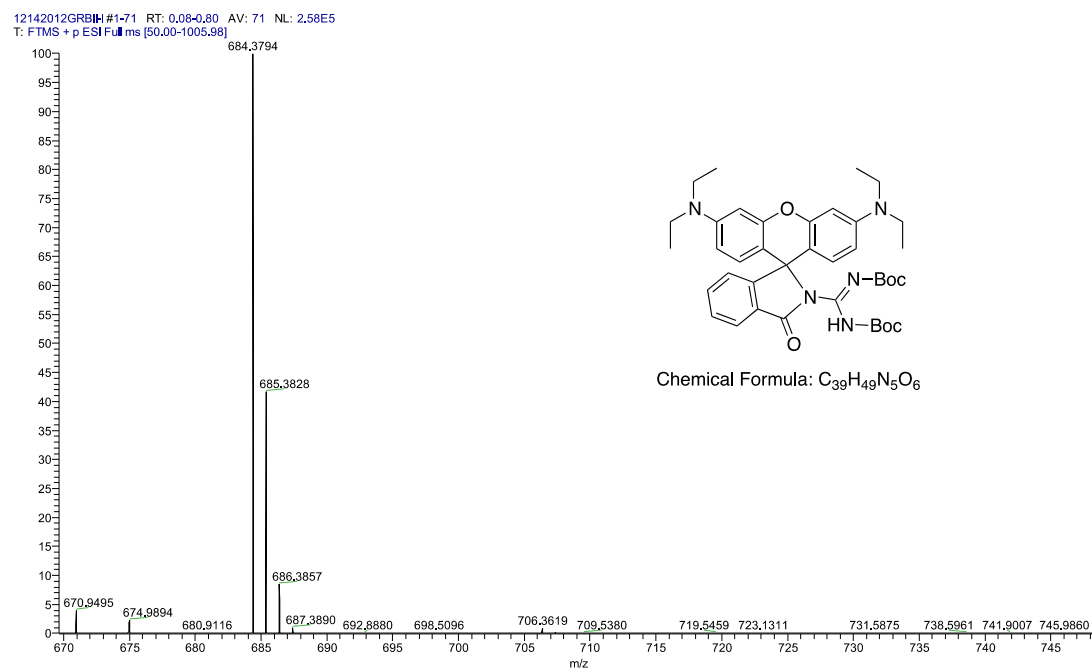

**Figure S25.** ESI-MS of **8**.

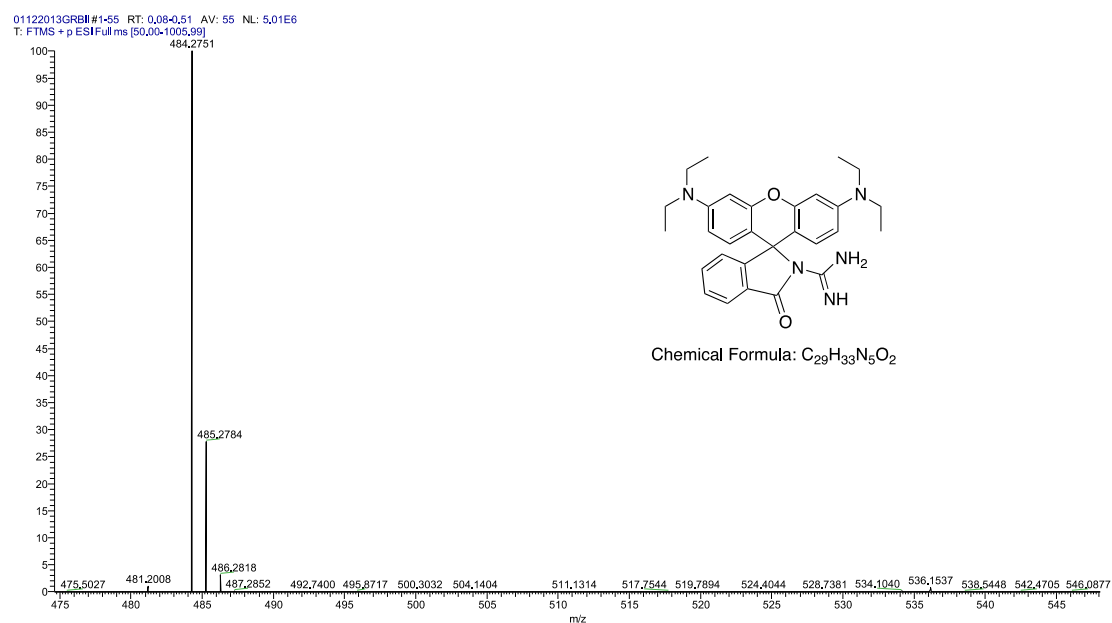

**Figure S26.** ESI-MS of **2**.

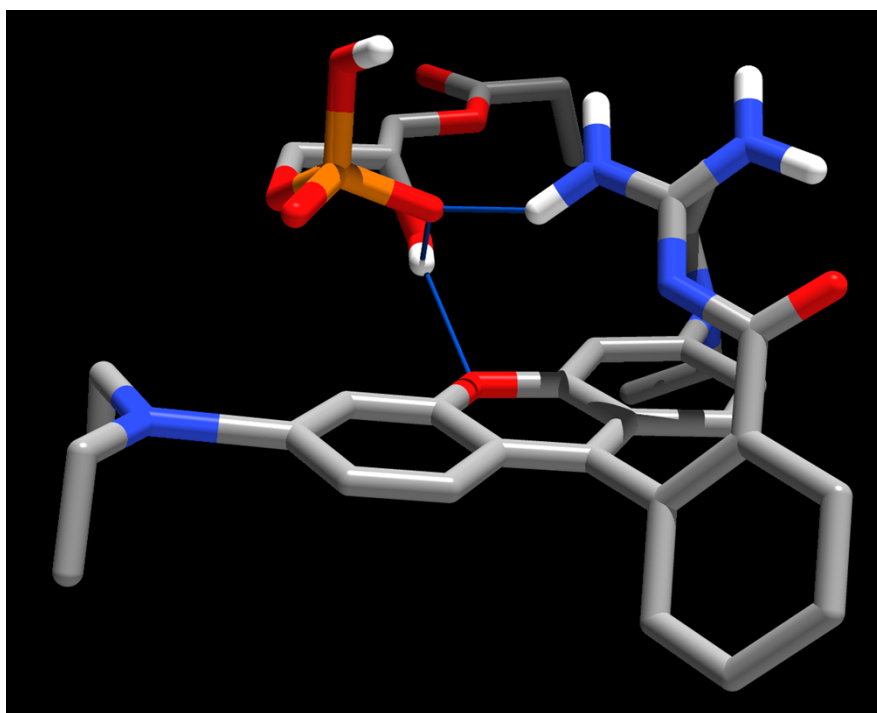

**Figure S27.** Energy-Minimized structure of **2** in the presence of LPA.

## References

1. J. Wang, M. Sibrian-Vazquez, J. O. Escobedo, M. Lowry, L. Wang, Y. H. Chu, R. G. Moore and R. M. Strongin, *Analyst*, 2013, **138**, 6852-6859.
2. X.-F. Yang, X.-Q. Guo and Y.-B. Zhao, *Talanta*, 2002, **57**, 883-890.
3. W. Liu, L. Xu, H. Zhang, J. You, X. Zhang, R. Sheng, H. Li, S. Wu and P. Wang, *Org. Biomol. Chem.*, 2009, **7**, 660-664.

<sup>a</sup>Department of Chemistry, Portland State University, Portland, OR 97201, USA.

E-

mail: [strongin@pdx.edu](mailto:strongin@pdx.edu); Tel: +1-503-725-9724.

<sup>b</sup>Women and Infants Hospital, Brown University, 101 Dudley Street, Providence, RI 02905, USA.

E-

mail: [RMoore@wihri.org](mailto:RMoore@wihri.org); Tel: +1-401-453-7520.
